# Supplementary material
Source: Springer Nature journal article supplement (https://www.springermedizin.de/resource/supplementary/12979_2009_68_MOESM4_ESM.pdf/9603326)

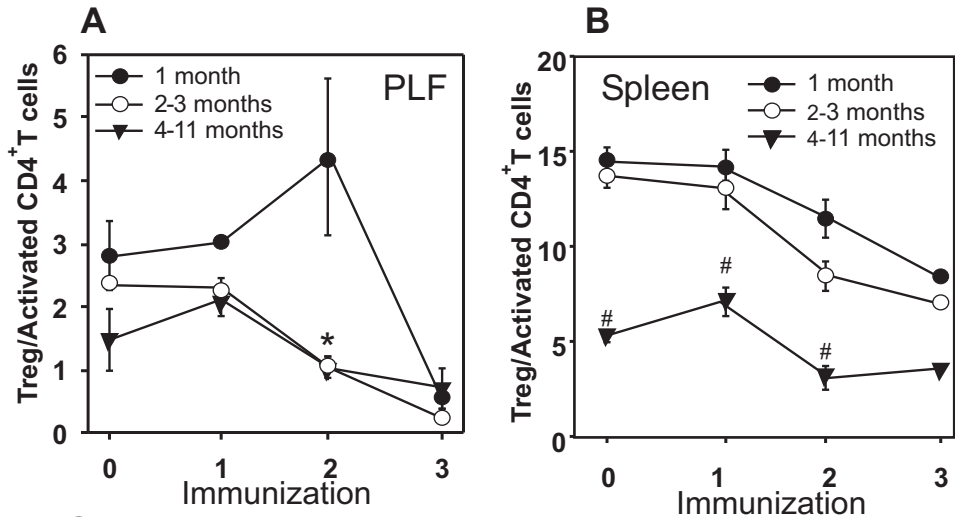

**C**

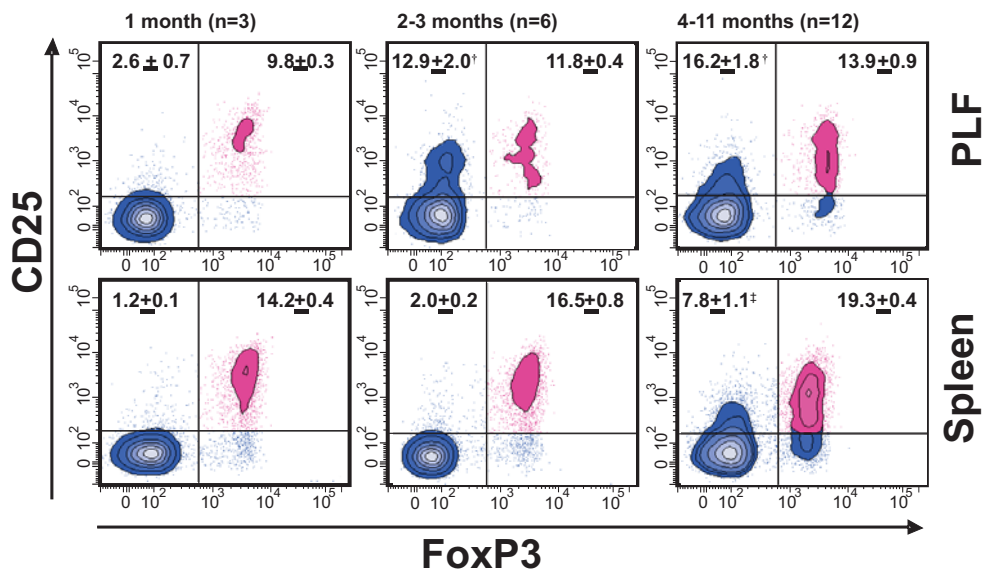

Supplement: MOESM4 [file 9603326]
